# Supplementary material for: Autophagy facilitates age-related cell apoptosis—a new insight from senile cataract
Source: PubMed Central journal article supplement (PMC8748728; doi:10.1038/s41419-021-04489-8), 2022-01-10
Supplement: 41419_2021_4489_MOESM3_ESM.pdf [file 41419_2021_4489_MOESM3_ESM.pdf]

Please complete the table below to indicate the contributions of all named authors to the figures.

Figure 1:

JH generated immunofluorescence data and labelled the image (panel A). QH and JH performed the statistical analysis (panel B). JH generated electron micrograph data and labelled the image (panel C). JH assembled the figure.

Figure 2:

JH generated the data and prepared panel A, B and F. JH and XH generated the western blot data and labelled the image (panel D and E). WY generated the data and prepared panel C. JH generated immunofluorescence data and labelled the image (panel H). JH performed the statistical analysis (panel G). QH and WY performed the statistical analysis (panel I and J). JH assembled the figure.

Figure 3:

WY generated the flow cytometry (panel A, B and F). XH generated the data and prepared panel C-D. QH generated the cell viability analysis and prepared panel E. QH performed the statistical analysis. JH assembled the figure.

Figure 4:

WY prepared the sample, analyzed the RNA sequencing data and prepared panel A and B. WY and MY generated the data and prepared panel C. JH and WY generated the western blot data and labelled the image (panel D, E and F). XH completed the lentivirus packaging. JH generated the cell viability analysis and prepared panel G. WY generated immunofluorescence data and labelled the image (panel H). QH performed the statistical analysis. JH assembled the figure.

Figure 5:

JH generated immunofluorescence data and labelled the image (panel A). QH performed the statistical analysis (panel B). JH and WY generated the western blot data and labelled the image (panel C and F). MY generated the data and prepared panel D. WY prepared the sample, analyzed the RNA sequencing data and prepared panel E. XH completed the lentivirus packaging. JH generated the cell viability analysis and prepared panel G. JH assembled the figure.

Figure 6:

JH and QH generated the western blot data and labelled the image (panel A, D, F, G and H). XH and JH completed the lentivirus packaging, generated the cell viability analysis and prepared panel E. WY generated immunofluorescence data and labelled the image (panel B and C). QH performed the statistical analysis. JH assembled the figure.

Figure 7: WY generated immunofluorescence data and labelled the image (panel A and D). WY generated the data and prepared panel B, C and E-G. QH performed the statistical analysis. JH assembled the figure.

Figure 8: QH drew the diagram and assembled the figure.

Signed for and on behalf of the Author(s)

Print Name:

Date:

*Hamwei Wei Chen*

Wei Han, Wei Chen

May 30, 2021
